# Supplementary material
Source: Research Square preprint supplement (doi:10.21203/rs.3.rs-9885979/v1)
Supplement: Supplementary file 1 [file 1fbae22ef0f52405ec25d02e.xlsx]

## Sheet: Sheet1
Peptide	Allele	Allergencity	Antigenecity
KLKKKSAFY	HLA-A*03:01, HLA-A*30:01, HLA-A*30:02, HLA-B*15:01	Allergen	Antigen
KPKHLYVSM	HLA-B*07:02	Non-allergen	Antigen
EPSGQTADW	HLA-B*53:01	Allergen	Antigen
RAYFINRQK	HLA-A*03:01, HLA-A*11:01, HLA-A*30:01, HLA-A*31:01, HLA-A*68:01	Non-allergen	Antigen
SPVMGVIGF	HLA-B*35:01	Allergen	Antigen
HLKEKSALR	HLA-A*31:01, HLA-A*33:01	Allergen	Antigen
