# Supplementary material
Source: Research Square preprint supplement (doi:10.21203/rs.3.rs-9885979/v1)
Supplement: Supplementary file 1 [file 31c3f94b1ed82be7e7365ef9.docx]

**Physical and Chemical Property of Vaccine**

**Number of amino acids:** 409

**Theoretical pI:** 9.41

**Molecular weight:** 44692.64

**Total number of negatively charged residues (Asp + Glu):** 51

**Total number of positively charged residues (Arg + Lys):** 62

**Formula:** C1986H3215N563O579S14

**Total number of atoms:** 6357

**Extinction coefficients:**

Extinction coefficients are in units of M-1 cm-1, at 280 nm measured in water.

Ext. coefficient 17420

Abs 0.1% (=1 g/l) 0.390, assuming all pairs of Cys residues form cystines

Ext. coefficient 17420

Abs 0.1% (=1 g/l) 0.390, assuming all Cys residues are reduced

**Estimated half-life:**

The N-terminal of the sequence considered is M (Met).

The estimated half-life is: 30 hours (mammalian reticulocytes, in vitro).

>20 hours (yeast, in vivo).

>10 hours (Escherichia coli, in vivo).

**Instability index:**

The instability index (II) is computed to be 24.94

This classifies the protein as stable.

**Aliphatic index:** 85.79

**Grand average of hydropathicity (GRAVY):**-0.212
