# Supplementary material
Source: Research Square preprint supplement (doi:10.21203/rs.3.rs-9885979/v1)
Supplement: Supplementary file 2 [file 4a5790a9b209726c571d140c.pdf]

# Ramachandran Plot

a001

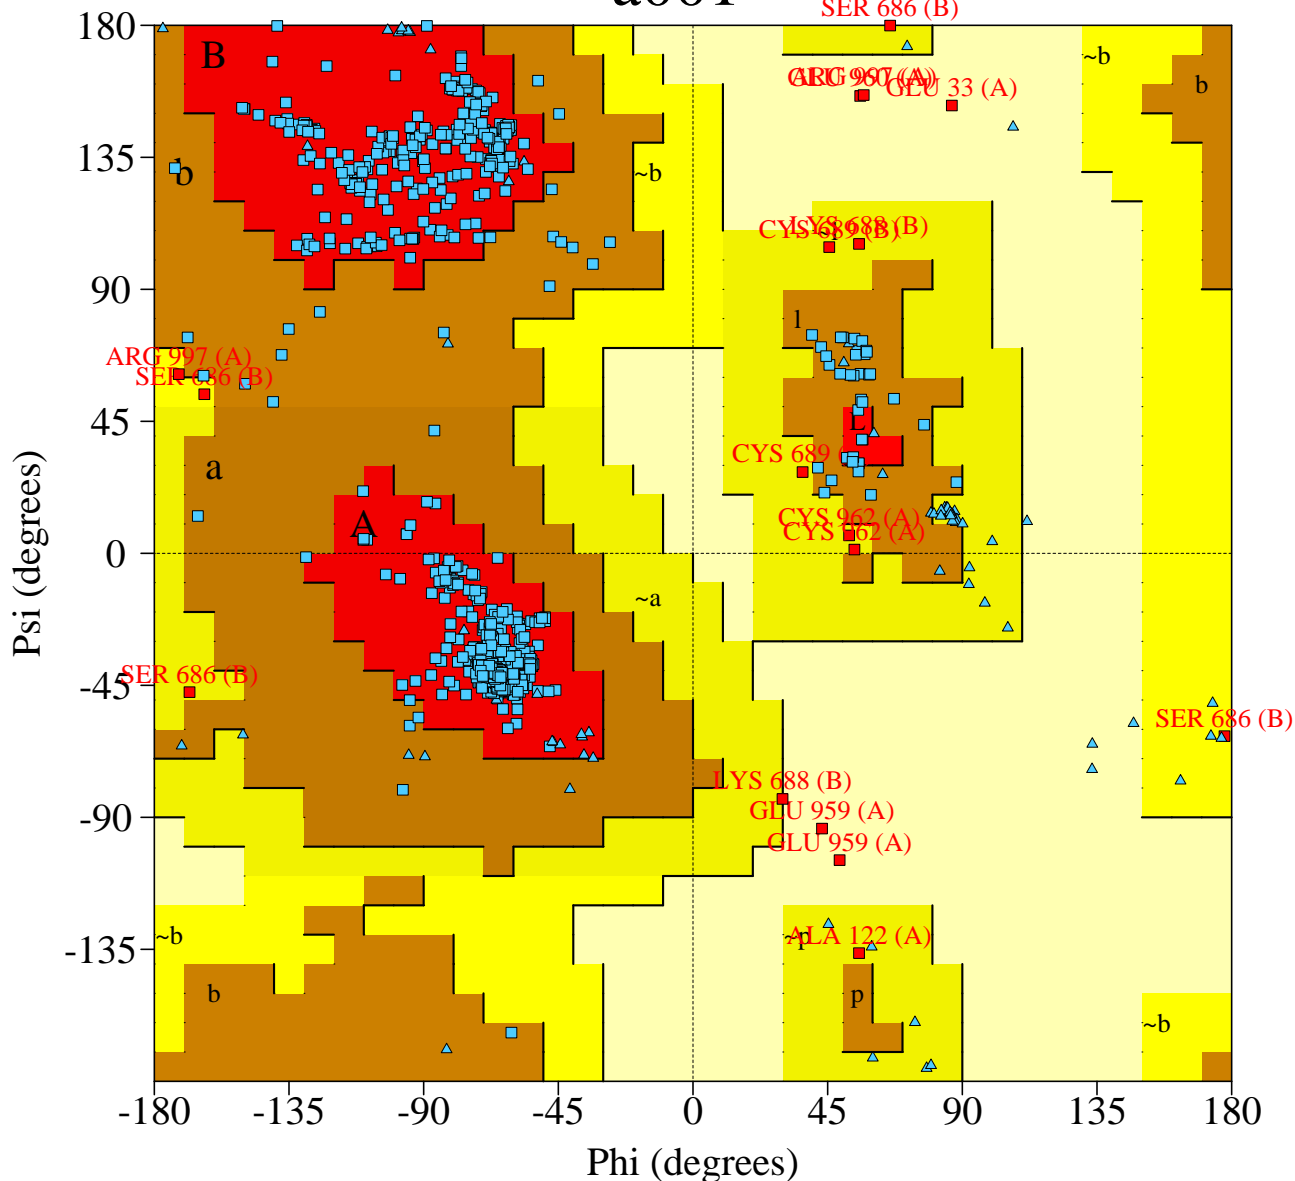

### Plot statistics

|                                                      |      |        |
|------------------------------------------------------|------|--------|
| Residues in most favoured regions [A,B,L]            | 1807 | 96.1%  |
| Residues in additional allowed regions [a,b,l,p]     | 56   | 3.0%   |
| Residues in generously allowed regions [-a,-b,-l,-p] | 12   | 0.6%   |
| Residues in disallowed regions                       | 5    | 0.3%   |
| -----                                                |      |        |
| Number of non-glycine and non-proline residues       | 1880 | 100.0% |
| Number of end-residues (excl. Gly and Pro)           | 23   |        |
| Number of glycine residues (shown as triangles)      | 233  |        |
| Number of proline residues                           | 100  |        |
| -----                                                |      |        |
| Total number of residues                             | 2236 |        |

Based on an analysis of 118 structures of resolution of at least 2.0 Angstroms and R-factor no greater than 20%, a good quality model would be expected to have over 90% in the most favoured regions.
