# Supplementary material
Source: Research Square preprint supplement (doi:10.21203/rs.3.rs-9885979/v1)
Supplement: Supplementary file 3 [file 4b0f64699a31091efb2a5b41.docx]

**Population Coverage Calculation Result**

| **population/area** | **Class I** | | |
| --- | --- | --- | --- |
| **coveragea** | **average_hitb** | **pc90c** |
| [World](https://tools.iedb.org/population/result/#World) | 80.72% | 2.52 | 0.52 |
|  |  |  |  |
| **Average** | **80.72** | **2.52** | **0.52** |
| **Standard deviation** | **0.0** | **0.0** | **0.0** |

***Population: World***

| **MHC class** | **Coverage** | **Average hit** | **PC90** |
| --- | --- | --- | --- |
| I | 80.72% | 2.52 | 0.52 |
| 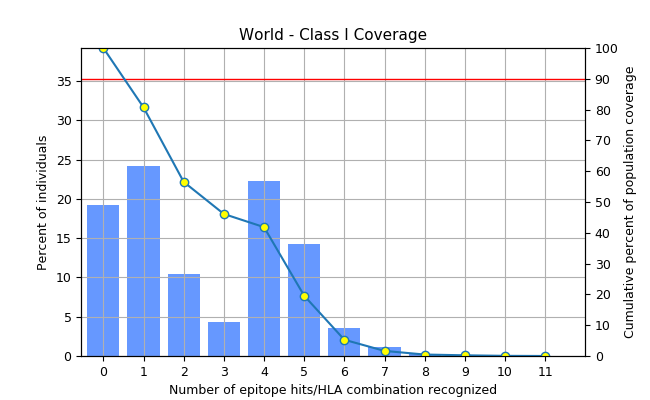 | | | |
| Top of Form  Bottom of Form | | | |
