# Supplementary material
Source: Research Square preprint supplement (doi:10.21203/rs.3.rs-9885979/v1)
Supplement: Supplementary file 4 [file 5a7e050fcb8675eb8cad1187.docx]

**Solubility Results**

**Job ID: 095aa658b5**

**Sequences: [input.fasta](https://loschmidt.chemi.muni.cz/soluprot/jobs/09/095aa658b5/input.fasta)**

| **Protein** | **Solubility** |
| --- | --- |
|  | **0.591** |

**Solubility score above 0.5 (towards green color) indicates soluble expression, score below 0.5 (towards red color) indicates insoluble expression in *Escherichia coli*.**
