# Supplementary material
Source: Research Square preprint supplement (doi:10.21203/rs.3.rs-9885979/v1)
Supplement: Supplementary file 5 [file 6bcba6f72afcfb8aa7239549.docx]

**VaxiJen RESULTS**

**Model selected: virus**

**Threshold for this model: 0.4**

**Your Sequence:**

MSNLQEVQEGITLHEQQLVAARQKLKDAEKA
VEVDPDDVNKSTLQSRRAAVSTLENKIAELK
RQLADLVAAQKLASKPVDPTGLEPDDHLKEK
SALRYGNVLDVNSIDLEEPSGQTADWKAIGA
YILGFVIPIVLKALYMLSTRGRQTVKENKGT
RIRFKDDSSYEEINGIRKPKHLYVSMPTAQS
TMKADEITPGRFRTIACGLFPAQIKARNIIS
PVMGVIGFGFFVKDWAERIEDFLASDCPFLP
KPKTQAESFMGTNRAYFINRQKQVDESRVPD
IVDLINAAESESATLFNDIAVPHSVWVFSCA
PDRCPPTALYVAGIPELGAFFSILQDMRNTI
MASKSVGTAEEKLKKKSAFYQSYLRRTQSMG
IQLDQKIIILYMLFWGKEAVNHFHLGDDMDP
ELRQLAQSLIDAKVKEISNQEPLKL


Overall Prediction for the Protective Antigen =**0.5889**( Probable **ANTIGEN** ).
