# Supplementary material
Source: Research Square preprint supplement (doi:10.21203/rs.3.rs-9885979/v1)
Supplement: Supplementary file 6 [file 76ec218c45ad72969595bba2.docx]

Toxicity Result of Vaccine

| **Peptides Scanned from Original Protein** | | | | |  | | | | | | | | | | | | | | | | | | | | |
| --- | --- | --- | --- | --- | --- | --- | --- | --- | --- | --- | --- | --- | --- | --- | --- | --- | --- | --- | --- | --- | --- | --- | --- | --- | --- |
| [**Peptide Sequence**](https://webs.iiitd.edu.in/raghava/toxinpred/prot_submitfreq_S.php?ran=42376) | [**SVM score**](https://webs.iiitd.edu.in/raghava/toxinpred/prot_submitfreq_S.php?ran=42376) | [**Prediction**](https://webs.iiitd.edu.in/raghava/toxinpred/prot_submitfreq_S.php?ran=42376) | [**Hydrophobicity**](https://webs.iiitd.edu.in/raghava/toxinpred/prot_submitfreq_S.php?ran=42376) | [**Hydropathicity**](https://webs.iiitd.edu.in/raghava/toxinpred/prot_submitfreq_S.php?ran=42376) | [**Hydrophilicity**](https://webs.iiitd.edu.in/raghava/toxinpred/prot_submitfreq_S.php?ran=42376) | [**Charge**](https://webs.iiitd.edu.in/raghava/toxinpred/prot_submitfreq_S.php?ran=42376) | [**Mol wt**](https://webs.iiitd.edu.in/raghava/toxinpred/prot_submitfreq_S.php?ran=42376) |  |  |  |  |  |  |  |  |  |  |  |  |  |  |  |  |  |  |
| [MAKLSTDELL](https://webs.iiitd.edu.in/raghava/toxinpred/pepsearch_S.php?seq=MAKLSTDELL&thval=0.0) | -1.20 | Non-Toxin | -0.08 | 0.27 | 0.17 | -1.00 | 1120.47 |  |  |  |  |  |  |  |  |  |  |  |  |  |  |  |  |  |  |
| [AKLSTDELLD](https://webs.iiitd.edu.in/raghava/toxinpred/pepsearch_S.php?seq=AKLSTDELLD&thval=0.0) | -1.29 | Non-Toxin | -0.18 | -0.27 | 0.60 | -2.00 | 1104.36 |  |  |  |  |  |  |  |  |  |  |  |  |  |  |  |  |  |  |
| [KLSTDELLDA](https://webs.iiitd.edu.in/raghava/toxinpred/pepsearch_S.php?seq=KLSTDELLDA&thval=0.0) | -1.46 | Non-Toxin | -0.18 | -0.27 | 0.60 | -2.00 | 1104.36 |  |  |  |  |  |  |  |  |  |  |  |  |  |  |  |  |  |  |
| [LSTDELLDAF](https://webs.iiitd.edu.in/raghava/toxinpred/pepsearch_S.php?seq=LSTDELLDAF&thval=0.0) | -1.47 | Non-Toxin | -0.00 | 0.40 | 0.05 | -3.00 | 1123.36 |  |  |  |  |  |  |  |  |  |  |  |  |  |  |  |  |  |  |
| [STDELLDAFK](https://webs.iiitd.edu.in/raghava/toxinpred/pepsearch_S.php?seq=STDELLDAFK&thval=0.0) | -1.38 | Non-Toxin | -0.17 | -0.37 | 0.53 | -2.00 | 1138.37 |  |  |  |  |  |  |  |  |  |  |  |  |  |  |  |  |  |  |
| [TDELLDAFKE](https://webs.iiitd.edu.in/raghava/toxinpred/pepsearch_S.php?seq=TDELLDAFKE&thval=0.0) | -1.23 | Non-Toxin | -0.20 | -0.64 | 0.80 | -3.00 | 1180.41 |  |  |  |  |  |  |  |  |  |  |  |  |  |  |  |  |  |  |
| [DELLDAFKEM](https://webs.iiitd.edu.in/raghava/toxinpred/pepsearch_S.php?seq=DELLDAFKEM&thval=0.0) | -1.05 | Non-Toxin | -0.16 | -0.38 | 0.71 | -3.00 | 1210.50 |  |  |  |  |  |  |  |  |  |  |  |  |  |  |  |  |  |  |
| [ELLDAFKEMT](https://webs.iiitd.edu.in/raghava/toxinpred/pepsearch_S.php?seq=ELLDAFKEMT&thval=0.0) | -1.30 | Non-Toxin | -0.11 | -0.10 | 0.37 | -2.00 | 1196.52 |  |  |  |  |  |  |  |  |  |  |  |  |  |  |  |  |  |  |
| [LLDAFKEMTL](https://webs.iiitd.edu.in/raghava/toxinpred/pepsearch_S.php?seq=LLDAFKEMTL&thval=0.0) | -1.24 | Non-Toxin | 0.01 | 0.63 | -0.11 | -1.00 | 1180.57 |  |  |  |  |  |  |  |  |  |  |  |  |  |  |  |  |  |  |
| [LDAFKEMTLL](https://webs.iiitd.edu.in/raghava/toxinpred/pepsearch_S.php?seq=LDAFKEMTLL&thval=0.0) | -1.24 | Non-Toxin | 0.01 | 0.63 | -0.11 | -1.00 | 1180.57 |  |  |  |  |  |  |  |  |  |  |  |  |  |  |  |  |  |  |
| [DAFKEMTLLE](https://webs.iiitd.edu.in/raghava/toxinpred/pepsearch_S.php?seq=DAFKEMTLLE&thval=0.0) | -1.07 | Non-Toxin | -0.11 | -0.10 | 0.37 | -2.00 | 1196.52 |  |  |  |  |  |  |  |  |  |  |  |  |  |  |  |  |  |  |
| [AFKEMTLLEL](https://webs.iiitd.edu.in/raghava/toxinpred/pepsearch_S.php?seq=AFKEMTLLEL&thval=0.0) | -1.29 | Non-Toxin | 0.02 | 0.63 | -0.11 | -1.00 | 1194.60 |  |  |  |  |  |  |  |  |  |  |  |  |  |  |  |  |  |  |
| [FKEMTLLELS](https://webs.iiitd.edu.in/raghava/toxinpred/pepsearch_S.php?seq=FKEMTLLELS&thval=0.0) | -1.26 | Non-Toxin | -0.03 | 0.37 | -0.03 | -1.00 | 1210.60 |  |  |  |  |  |  |  |  |  |  |  |  |  |  |  |  |  |  |
| [KEMTLLELSD](https://webs.iiitd.edu.in/raghava/toxinpred/pepsearch_S.php?seq=KEMTLLELSD&thval=0.0) | -1.36 | Non-Toxin | -0.17 | -0.26 | 0.52 | -2.00 | 1178.51 |  |  |  |  |  |  |  |  |  |  |  |  |  |  |  |  |  |  |
| [EMTLLELSDF](https://webs.iiitd.edu.in/raghava/toxinpred/pepsearch_S.php?seq=EMTLLELSDF&thval=0.0) | -1.59 | Non-Toxin | 0.01 | 0.41 | -0.03 | -3.00 | 1197.51 |  |  |  |  |  |  |  |  |  |  |  |  |  |  |  |  |  |  |
| [MTLLELSDFV](https://webs.iiitd.edu.in/raghava/toxinpred/pepsearch_S.php?seq=MTLLELSDFV&thval=0.0) | -1.82 | Non-Toxin | 0.12 | 1.18 | -0.48 | -2.00 | 1167.53 |  |  |  |  |  |  |  |  |  |  |  |  |  |  |  |  |  |  |
| [TLLELSDFVK](https://webs.iiitd.edu.in/raghava/toxinpred/pepsearch_S.php?seq=TLLELSDFVK&thval=0.0) | -1.62 | Non-Toxin | -0.01 | 0.60 | -0.05 | -1.00 | 1164.51 |  |  |  |  |  |  |  |  |  |  |  |  |  |  |  |  |  |  |
| [LLELSDFVKK](https://webs.iiitd.edu.in/raghava/toxinpred/pepsearch_S.php?seq=LLELSDFVKK&thval=0.0) | -1.51 | Non-Toxin | -0.11 | 0.28 | 0.29 | 0.00 | 1191.58 |  |  |  |  |  |  |  |  |  |  |  |  |  |  |  |  |  |  |
| [LELSDFVKKF](https://webs.iiitd.edu.in/raghava/toxinpred/pepsearch_S.php?seq=LELSDFVKKF&thval=0.0) | -1.02 | Non-Toxin | -0.10 | 0.18 | 0.22 | 0.00 | 1225.59 |  |  |  |  |  |  |  |  |  |  |  |  |  |  |  |  |  |  |
| [ELSDFVKKFE](https://webs.iiitd.edu.in/raghava/toxinpred/pepsearch_S.php?seq=ELSDFVKKFE&thval=0.0) | -0.93 | Non-Toxin | -0.21 | -0.55 | 0.70 | -1.00 | 1241.54 |  |  |  |  |  |  |  |  |  |  |  |  |  |  |  |  |  |  |
| [LSDFVKKFEE](https://webs.iiitd.edu.in/raghava/toxinpred/pepsearch_S.php?seq=LSDFVKKFEE&thval=0.0) | -0.66 | Non-Toxin | -0.21 | -0.55 | 0.70 | -1.00 | 1241.54 |  |  |  |  |  |  |  |  |  |  |  |  |  |  |  |  |  |  |
| [SDFVKKFEET](https://webs.iiitd.edu.in/raghava/toxinpred/pepsearch_S.php?seq=SDFVKKFEET&thval=0.0) | -0.69 | Non-Toxin | -0.28 | -1.00 | 0.84 | -1.00 | 1229.48 |  |  |  |  |  |  |  |  |  |  |  |  |  |  |  |  |  |  |
| [DFVKKFEETF](https://webs.iiitd.edu.in/raghava/toxinpred/pepsearch_S.php?seq=DFVKKFEETF&thval=0.0) | -0.80 | Non-Toxin | -0.20 | -0.64 | 0.56 | -1.00 | 1289.58 |  |  |  |  |  |  |  |  |  |  |  |  |  |  |  |  |  |  |
| [FVKKFEETFE](https://webs.iiitd.edu.in/raghava/toxinpred/pepsearch_S.php?seq=FVKKFEETFE&thval=0.0) | -0.68 | Non-Toxin | -0.19 | -0.64 | 0.56 | -1.00 | 1303.61 |  |  |  |  |  |  |  |  |  |  |  |  |  |  |  |  |  |  |
| [VKKFEETFEV](https://webs.iiitd.edu.in/raghava/toxinpred/pepsearch_S.php?seq=VKKFEETFEV&thval=0.0) | -0.59 | Non-Toxin | -0.19 | -0.50 | 0.66 | -1.00 | 1255.57 |  |  |  |  |  |  |  |  |  |  |  |  |  |  |  |  |  |  |
| [KKFEETFEVT](https://webs.iiitd.edu.in/raghava/toxinpred/pepsearch_S.php?seq=KKFEETFEVT&thval=0.0) | -0.76 | Non-Toxin | -0.27 | -0.99 | 0.77 | -1.00 | 1257.54 |  |  |  |  |  |  |  |  |  |  |  |  |  |  |  |  |  |  |
| [KFEETFEVTA](https://webs.iiitd.edu.in/raghava/toxinpred/pepsearch_S.php?seq=KFEETFEVTA&thval=0.0) | -0.84 | Non-Toxin | -0.13 | -0.42 | 0.42 | -2.00 | 1200.44 |  |  |  |  |  |  |  |  |  |  |  |  |  |  |  |  |  |  |
| [FEETFEVTAA](https://webs.iiitd.edu.in/raghava/toxinpred/pepsearch_S.php?seq=FEETFEVTAA&thval=0.0) | -1.08 | Non-Toxin | 0.00 | 0.15 | 0.07 | -3.00 | 1143.34 |  |  |  |  |  |  |  |  |  |  |  |  |  |  |  |  |  |  |
| [EETFEVTAAA](https://webs.iiitd.edu.in/raghava/toxinpred/pepsearch_S.php?seq=EETFEVTAAA&thval=0.0) | -1.18 | Non-Toxin | -0.03 | 0.05 | 0.27 | -3.00 | 1067.24 |  |  |  |  |  |  |  |  |  |  |  |  |  |  |  |  |  |  |
| [ETFEVTAAAP](https://webs.iiitd.edu.in/raghava/toxinpred/pepsearch_S.php?seq=ETFEVTAAAP&thval=0.0) | -1.35 | Non-Toxin | 0.02 | 0.24 | -0.03 | -2.00 | 1035.24 |  |  |  |  |  |  |  |  |  |  |  |  |  |  |  |  |  |  |
| [TFEVTAAAPV](https://webs.iiitd.edu.in/raghava/toxinpred/pepsearch_S.php?seq=TFEVTAAAPV&thval=0.0) | -1.36 | Non-Toxin | 0.14 | 1.01 | -0.48 | -1.00 | 1005.26 |  |  |  |  |  |  |  |  |  |  |  |  |  |  |  |  |  |  |
| [FEVTAAAPVA](https://webs.iiitd.edu.in/raghava/toxinpred/pepsearch_S.php?seq=FEVTAAAPVA&thval=0.0) | -1.36 | Non-Toxin | 0.18 | 1.26 | -0.49 | -1.00 | 975.23 |  |  |  |  |  |  |  |  |  |  |  |  |  |  |  |  |  |  |
| [EVTAAAPVAV](https://webs.iiitd.edu.in/raghava/toxinpred/pepsearch_S.php?seq=EVTAAAPVAV&thval=0.0) | -1.37 | Non-Toxin | 0.17 | 1.40 | -0.39 | -1.00 | 927.19 |  |  |  |  |  |  |  |  |  |  |  |  |  |  |  |  |  |  |
| [VTAAAPVAVA](https://webs.iiitd.edu.in/raghava/toxinpred/pepsearch_S.php?seq=VTAAAPVAVA&thval=0.0) | -1.16 | Non-Toxin | 0.26 | 1.93 | -0.74 | 0.00 | 869.15 |  |  |  |  |  |  |  |  |  |  |  |  |  |  |  |  |  |  |
| [TAAAPVAVAA](https://webs.iiitd.edu.in/raghava/toxinpred/pepsearch_S.php?seq=TAAAPVAVAA&thval=0.0) | -1.06 | Non-Toxin | 0.23 | 1.69 | -0.64 | 0.00 | 841.09 |  |  |  |  |  |  |  |  |  |  |  |  |  |  |  |  |  |  |
| [AAAPVAVAAA](https://webs.iiitd.edu.in/raghava/toxinpred/pepsearch_S.php?seq=AAAPVAVAAA&thval=0.0) | -1.00 | Non-Toxin | 0.28 | 1.94 | -0.65 | 0.00 | 811.06 |  |  |  |  |  |  |  |  |  |  |  |  |  |  |  |  |  |  |
| [AAPVAVAAAG](https://webs.iiitd.edu.in/raghava/toxinpred/pepsearch_S.php?seq=AAPVAVAAAG&thval=0.0) | -1.00 | Non-Toxin | 0.27 | 1.72 | -0.60 | 0.00 | 797.04 |  |  |  |  |  |  |  |  |  |  |  |  |  |  |  |  |  |  |
| [APVAVAAAGA](https://webs.iiitd.edu.in/raghava/toxinpred/pepsearch_S.php?seq=APVAVAAAGA&thval=0.0) | -0.67 | Non-Toxin | 0.27 | 1.72 | -0.60 | 0.00 | 797.04 |  |  |  |  |  |  |  |  |  |  |  |  |  |  |  |  |  |  |
| [PVAVAAAGAA](https://webs.iiitd.edu.in/raghava/toxinpred/pepsearch_S.php?seq=PVAVAAAGAA&thval=0.0) | -0.81 | Non-Toxin | 0.27 | 1.72 | -0.60 | 0.00 | 797.04 |  |  |  |  |  |  |  |  |  |  |  |  |  |  |  |  |  |  |
| [VAVAAAGAAP](https://webs.iiitd.edu.in/raghava/toxinpred/pepsearch_S.php?seq=VAVAAAGAAP&thval=0.0) | -0.76 | Non-Toxin | 0.27 | 1.72 | -0.60 | 0.00 | 797.04 |  |  |  |  |  |  |  |  |  |  |  |  |  |  |  |  |  |  |
| [AVAAAGAAPA](https://webs.iiitd.edu.in/raghava/toxinpred/pepsearch_S.php?seq=AVAAAGAAPA&thval=0.0) | -1.00 | Non-Toxin | 0.24 | 1.48 | -0.50 | 0.00 | 768.98 |  |  |  |  |  |  |  |  |  |  |  |  |  |  |  |  |  |  |
| [VAAAGAAPAA](https://webs.iiitd.edu.in/raghava/toxinpred/pepsearch_S.php?seq=VAAAGAAPAA&thval=0.0) | -1.10 | Non-Toxin | 0.24 | 1.48 | -0.50 | 0.00 | 768.98 |  |  |  |  |  |  |  |  |  |  |  |  |  |  |  |  |  |  |
| [AAAGAAPAAA](https://webs.iiitd.edu.in/raghava/toxinpred/pepsearch_S.php?seq=AAAGAAPAAA&thval=0.0) | -1.02 | Non-Toxin | 0.21 | 1.24 | -0.40 | 0.00 | 740.92 |  |  |  |  |  |  |  |  |  |  |  |  |  |  |  |  |  |  |
| [AAGAAPAAAA](https://webs.iiitd.edu.in/raghava/toxinpred/pepsearch_S.php?seq=AAGAAPAAAA&thval=0.0) | -1.02 | Non-Toxin | 0.21 | 1.24 | -0.40 | 0.00 | 740.92 |  |  |  |  |  |  |  |  |  |  |  |  |  |  |  |  |  |  |
| [AGAAPAAAAP](https://webs.iiitd.edu.in/raghava/toxinpred/pepsearch_S.php?seq=AGAAPAAAAP&thval=0.0) | -1.09 | Non-Toxin | 0.18 | 0.90 | -0.35 | 0.00 | 766.96 |  |  |  |  |  |  |  |  |  |  |  |  |  |  |  |  |  |  |
| [GAAPAAAAPA](https://webs.iiitd.edu.in/raghava/toxinpred/pepsearch_S.php?seq=GAAPAAAAPA&thval=0.0) | -1.03 | Non-Toxin | 0.18 | 0.90 | -0.35 | 0.00 | 766.96 |  |  |  |  |  |  |  |  |  |  |  |  |  |  |  |  |  |  |
| [AAPAAAAPAA](https://webs.iiitd.edu.in/raghava/toxinpred/pepsearch_S.php?seq=AAPAAAAPAA&thval=0.0) | -0.94 | Non-Toxin | 0.19 | 1.12 | -0.40 | 0.00 | 780.98 |  |  |  |  |  |  |  |  |  |  |  |  |  |  |  |  |  |  |
| [APAAAAPAAE](https://webs.iiitd.edu.in/raghava/toxinpred/pepsearch_S.php?seq=APAAAAPAAE&thval=0.0) | -1.01 | Non-Toxin | 0.10 | 0.59 | -0.05 | -1.00 | 839.02 |  |  |  |  |  |  |  |  |  |  |  |  |  |  |  |  |  |  |
| [PAAAAPAAEE](https://webs.iiitd.edu.in/raghava/toxinpred/pepsearch_S.php?seq=PAAAAPAAEE&thval=0.0) | -1.04 | Non-Toxin | 0.01 | 0.06 | 0.30 | -2.00 | 897.06 |  |  |  |  |  |  |  |  |  |  |  |  |  |  |  |  |  |  |
| [AAAAPAAEEA](https://webs.iiitd.edu.in/raghava/toxinpred/pepsearch_S.php?seq=AAAAPAAEEA&thval=0.0) | -1.13 | Non-Toxin | 0.04 | 0.40 | 0.25 | -2.00 | 871.02 |  |  |  |  |  |  |  |  |  |  |  |  |  |  |  |  |  |  |
