# Supplementary material
Source: Research Square preprint supplement (doi:10.21203/rs.3.rs-9885979/v1)
Supplement: Supplementary file 8 [file a1425437a7411e053ff20430.pdf]

# C-IMMSIM simulation results

May 21, 2026

## Abstract

This document includes the plots relative to the simulation and the outcome of the epitope/peptide prediction used.

Produced by the C-IMMSIM Online server available at  
<http://c-immsim.iac.rm.cnr.it> (alias to <http://kraken.iac.rm.cnr.it/C-IMMSIM>)

CITATIONS: For publication of results, please cite the following:

Nicolas Rapin, Ole Lund, Massimo Bernaschi, Filippo Castiglione. Computational Immunology Meets Bioinformatics: The Use of Prediction Tools for Molecular Binding in the Simulation of the Immune System. PLoS ONE 5(4): e9862  
doi:10.1371/journal.pone.0009862, 2010

A retrospective validation

In-silico evaluation of adenoviral COVID-19 vaccination protocols: Assessment of immunological memory up to 6 months after the third dose. P. Stolfi, F. Castiglione, E. Mastrostefano, I. Di Biase, S. Di Biase, G. Palmieri, A. Prisco. Frontiers in Immunology, 13 (2022) doi: 10.3389/fimmu.2022.998262  
<https://www.frontiersin.org/articles/10.3389/fimmu.2022.998262>

An in vivo validation

Identification and validation of viral antigens sharing sequence and structural homology with tumor associated antigens (TAAs). C. Ragone, C. Manolio, B. Cavalluzzo, A. Petrizzo, A. Mauriello, M-L. Tornesello, F. M. Buonaguro, F. Castiglione, L. Vitagliano, M. Ruvo, M. Tagliamonte, L. Buonaguro. Journal for ImmunoTherapy of Cancer. 9:e002694 (2021)  
<https://jitc.bmj.com/content/9/5/e002694>

Original C-IMMSIM model: [www.iac.cnr.it/~filippo/c-immsim](http://www.iac.cnr.it/~filippo/c-immsim)

GETTING HELP:

Scientific problems: Filippo Castiglione (filippo dot castiglione at cnr dot it)

Technical problems: Ilaria Gonnella (ilaria dot gonnella at cnr dot it)

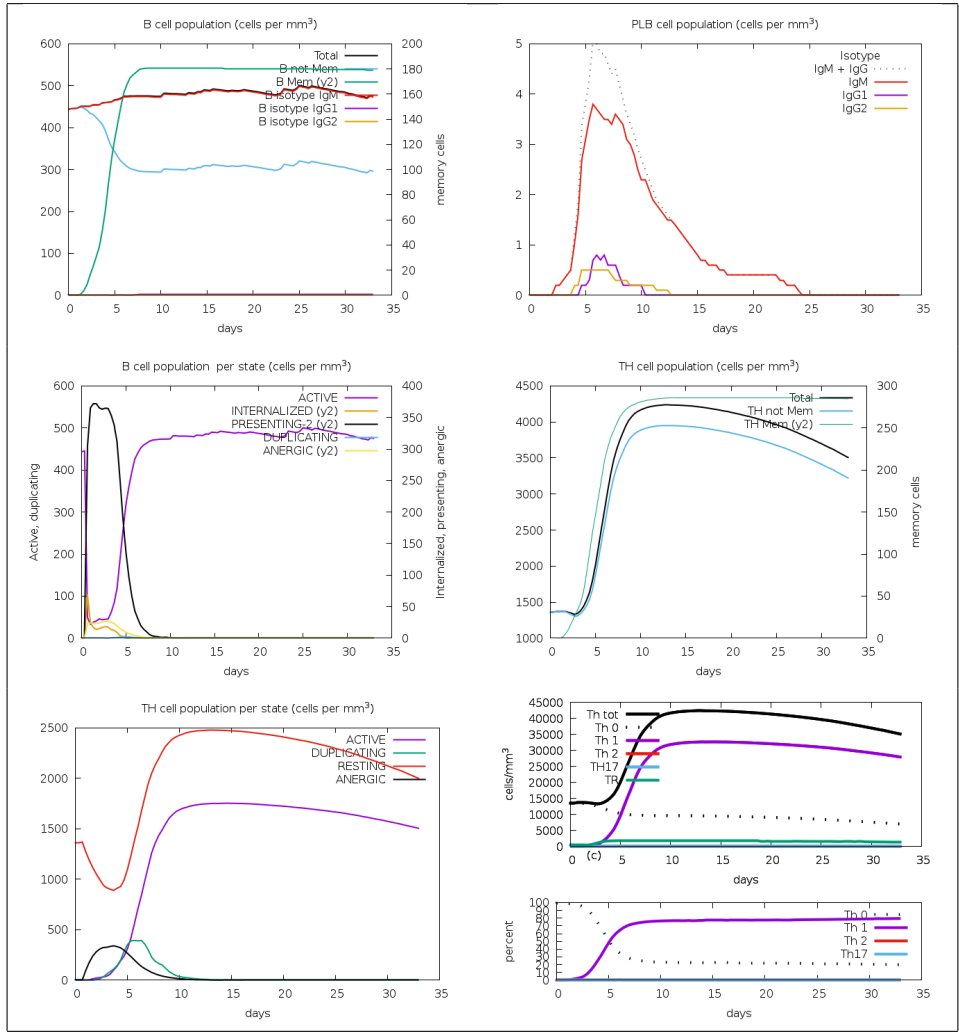

Figure 1: Cell counts shown. Legend: Act=active, Intern=internalized the Ag, Pres II = presenting on MHC II, Dup = in the mitotic cycle, Anergic = anergic, Resting = not active.

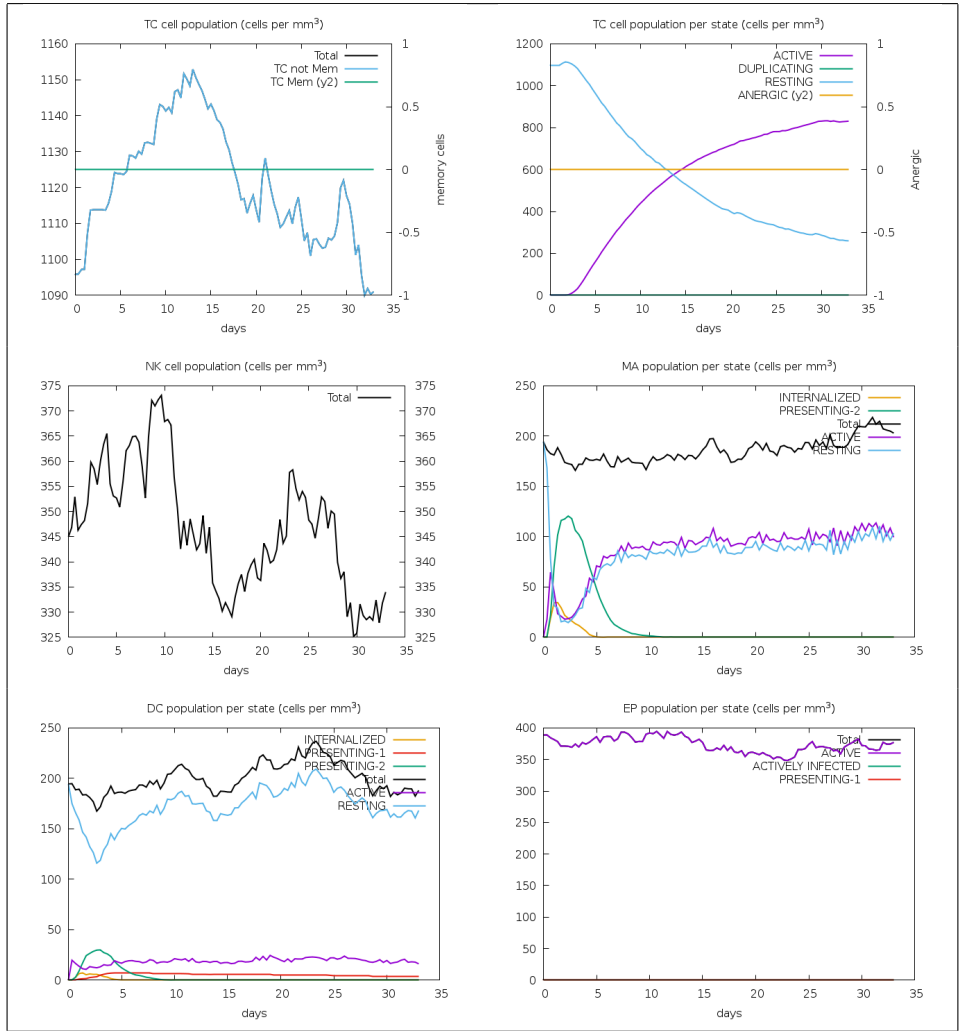

Figure 2: Legend: symbols as figure above.

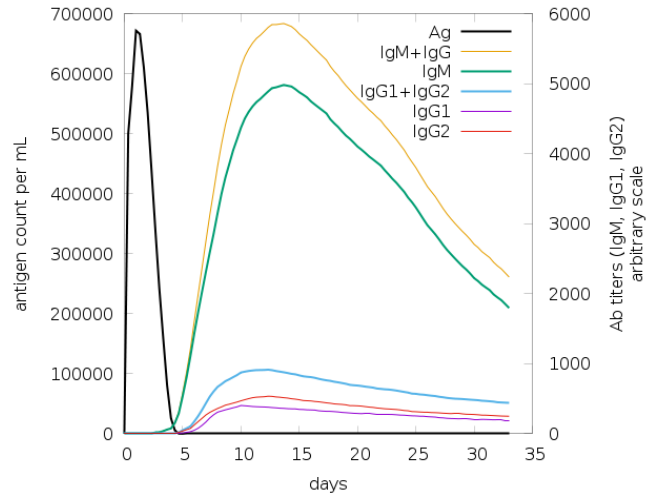

Figure 3: The virus, the immunoglobulins and the immunocomplexes.

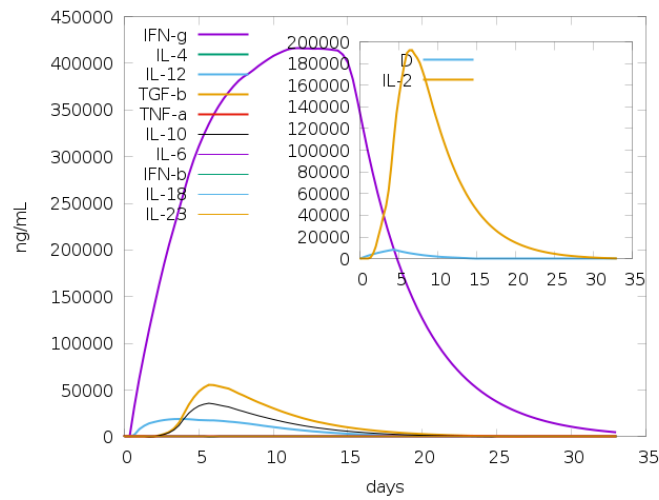

Figure 4: Concentration of cytokines and interleukins. Inset plot shows danger signal together with leukocyte growth factor IL-2.



Epitopes of protein 0 -----  
0] pos= 4 score=0.046437 unnormalised=5.105600000 STDELLDAF  
1] pos= -1 score=0.953563 unnormalised=104.841000000 non-binding event

=====  
Allele: A0101  
Pseudo sequence: KAVHAEQRNKAQTRA  
Threshold: 9.456400  
Max score: 29.236000

-----  
Antigen sequence file: /opt/lampp/htdocs/C-IMMSIM/Jobs/input/50712\_20260521-164125\_5\_z3nbfLoryBar.FSA\_1\_001  
-----

MAKLSTDELLDAFKEMTLELSDFVKKFEETFEVTAAPVAVAAAGAAPAAAAPAEEAAEEAAEEDDIDLMMVVGVEVPA  
ARAVVNVKVELDVGKTAAKIGAILTAAMAKTEAAKPVVEAAGAEAAARKLEDRVNSDILEEAAKVAQKLASKPVDPTGL  
EPDDHLKEKSALRYGNVLAQSTMKADEITPGRFRMASKSVGTAEKFLGDDMDPELRCPGPKHLYVSMRAYFINRQ  
KGVIGFGFFVFIPIVLKAMLFWGKEAVTLQSRRAAVTNRAYFINRGLFPAQIKAAAYRQTVKENKGTRIRFKIPIVLKA  
LYMLSTRGKEKSALRYGNVLDVNSFMGTNRAYFINRQKRQTVKENKGTRIRFKDMRNTIMASKSVGTALKRQLADLVAAQ  
KLAHHHHHH

Epitopes of protein 0 -----  
0] pos= 4 score=0.046437 unnormalised=5.105600000 STDELLDAF  
1] pos= -1 score=0.953563 unnormalised=104.841000000 non-binding event

=====  
Allele: B0702  
Pseudo sequence: KAAREEQIKAQTRE  
Threshold: 8.702800  
Max score: 28.406000

-----  
Antigen sequence file: /opt/lampp/htdocs/C-IMMSIM/Jobs/input/50712\_20260521-164125\_5\_z3nbfLoryBar.FSA\_1\_001  
-----

MAKLSTDELLDAFKEMTLELSDFVKKFEETFEVTAAPVAVAAAGAAPAAAAPAEEAAEEAAEEDDIDLMMVVGVEVPA  
ARAVVNVKVELDVGKTAAKIGAILTAAMAKTEAAKPVVEAAGAEAAARKLEDRVNSDILEEAAKVAQKLASKPVDPTGL  
EPDDHLKEKSALRYGNVLAQSTMKADEITPGRFRMASKSVGTAEKFLGDDMDPELRCPGPKHLYVSMRAYFINRQ  
KGVIGFGFFVFIPIVLKAMLFWGKEAVTLQSRRAAVTNRAYFINRGLFPAQIKAAAYRQTVKENKGTRIRFKIPIVLKA  
LYMLSTRGKEKSALRYGNVLDVNSFMGTNRAYFINRQKRQTVKENKGTRIRFKDMRNTIMASKSVGTALKRQLADLVAAQ  
KLAHHHHHH

Epitopes of protein 0 -----  
0] pos= 47 score=0.063183 unnormalised=7.604200000 APAAAAPAA  
1] pos= 223 score=0.020591 unnormalised=2.478200000 KPKHLYVSM  
2] pos= 252 score=0.005510 unnormalised=0.663200000 IPIVLKAML  
3] pos= 288 score=0.039602 unnormalised=4.766200000 FPAQIKAAA  
4] pos= -1 score=0.871114 unnormalised=104.841000000 non-binding event

=====  
Allele: B0702  
Pseudo sequence: KAAREEQIKAQTRE  
Threshold: 8.702800  
Max score: 28.406000

-----  
Antigen sequence file: /opt/lampp/htdocs/C-IMMSIM/Jobs/input/50712\_20260521-164125\_5\_z3nbfLoryBar.FSA\_1\_001  
-----

MAKLSTDELLDAFKEMTLELSDVFKFEETFEVTAAPVAVAAAGAAPAAAAPAAEEAAEEAAEEDDIDLMMVVGVEVPA  
ARAVVNVKVELDGGKTAAKIGAILTAAMAKTEAAKPVVEAAGAEAAARKLEDRVNSDILEEAAAKVAAQKLASKPVDPTGL  
EPDDLKKEKSALRYGNVLAQSTMKADEITPGRFRMASKSVGTAEKFLHGDMDPELRCPGPGPKHLYVSMRAYFINRQ  
KGVIGFGFFVFIPIVLKAMLFWGKEAVTLQSRRAAVTNRAYFINRGLFPAQIKAAAYRQTVKENKGTRIRFKIPIVLKA  
LYMLSTRGKEKSALRYGNVLDVNSFMGTNRAYFINRQKRQTVKENKGTRIRFKDMRNTIMASKSVGTALKRQLADLVAAQ  
KLAHHHHHH

Epitopes of protein 0 -----

|    |          |                |                            |                   |
|----|----------|----------------|----------------------------|-------------------|
| 0] | pos= 47  | score=0.063183 | unnormalised=7.604200000   | APAAAAAPAA        |
| 1] | pos= 223 | score=0.020591 | unnormalised=2.478200000   | KPKHLYVSM         |
| 2] | pos= 252 | score=0.005510 | unnormalised=0.663200000   | IPIVLKAML         |
| 3] | pos= 288 | score=0.039602 | unnormalised=4.766200000   | FPAQIKAAA         |
| 4] | pos= -1  | score=0.871114 | unnormalised=104.841000000 | non-binding event |

DoPeptideList\_II:

Given the antigen injected creates the list of peptides for all the  
NumAgProts proteins and for all i.e., 2 MHCII molecules

Read class II peptide list from file? NO

Allele: DRB1\_0101

Pseudo sequence: KFAHVEQRKAQTRV

Threshold: 2.392440

Max score: 26.461000

Antigen sequence file: /opt/lampp/htdocs/C-IMMSIM/Jobs/input/50712\_20260521-164125\_5\_z3nbfLoryBar.FSA\_1\_001

MAKLSTDELLDAFKEMTLELSDVFKFEETFEVTAAPVAVAAAGAAPAAAAPAAEEAAEEAAEEDDIDLMMVVGVEVPA  
ARAVVNVKVELDGGKTAAKIGAILTAAMAKTEAAKPVVEAAGAEAAARKLEDRVNSDILEEAAAKVAAQKLASKPVDPTGL  
EPDDLKKEKSALRYGNVLAQSTMKADEITPGRFRMASKSVGTAEKFLHGDMDPELRCPGPGPKHLYVSMRAYFINRQ  
KGVIGFGFFVFIPIVLKAMLFWGKEAVTLQSRRAAVTNRAYFINRGLFPAQIKAAAYRQTVKENKGTRIRFKIPIVLKA  
LYMLSTRGKEKSALRYGNVLDVNSFMGTNRAYFINRQKRQTVKENKGTRIRFKDMRNTIMASKSVGTALKRQLADLVAAQ  
KLAHHHHHH

Epitopes of protein 0 -----

|     |          |                |                           |           |
|-----|----------|----------------|---------------------------|-----------|
| 0]  | pos= 12  | score=0.005569 | unnormalised=0.881560000  | FKEMTLEL  |
| 1]  | pos= 31  | score=0.050380 | unnormalised=7.975560000  | FEVTAAPV  |
| 2]  | pos= 33  | score=0.049533 | unnormalised=7.841560000  | VTAAAPVAV |
| 3]  | pos= 39  | score=0.001330 | unnormalised=0.210560000  | VAVAAAGAA |
| 4]  | pos= 41  | score=0.031183 | unnormalised=4.936560000  | VAAAGAAPA |
| 5]  | pos= 75  | score=0.001153 | unnormalised=0.182560000  | VEVPAARAV |
| 6]  | pos= 98  | score=0.019251 | unnormalised=3.047560000  | IGAILTAAM |
| 7]  | pos= 136 | score=0.013881 | unnormalised=2.197560000  | ILEEAAAKV |
| 8]  | pos= 173 | score=0.046034 | unnormalised=7.287560000  | YGNVLAQST |
| 9]  | pos= 176 | score=0.017362 | unnormalised=2.748560000  | VLAQSTMKA |
| 10] | pos= 228 | score=0.107041 | unnormalised=16.945560000 | YVSMRAYFI |
| 11] | pos= 236 | score=0.021076 | unnormalised=3.336560000  | INRQKGVIG |
| 12] | pos= 248 | score=0.027121 | unnormalised=4.293560000  | FVFVIPIVL |
| 13] | pos= 261 | score=0.000698 | unnormalised=0.110560000  | FWGKEAVTL |
| 14] | pos= 269 | score=0.014936 | unnormalised=2.364560000  | LQSRRAAVT |
| 15] | pos= 292 | score=0.002574 | unnormalised=0.407560000  | IKAAAYRQT |
| 16] | pos= 301 | score=0.002972 | unnormalised=0.470560000  | VKENKGTRI |
| 17] | pos= 317 | score=0.023079 | unnormalised=3.653560000  | LKALYMLST |
| 18] | pos= 345 | score=0.018297 | unnormalised=2.896560000  | MGTNRAYFI |
| 19] | pos= 361 | score=0.002972 | unnormalised=0.470560000  | VKENKGTRI |

|     |          |                |                            |                   |
|-----|----------|----------------|----------------------------|-------------------|
| 20] | pos= 371 | score=0.051068 | unnormalised=8.0845600000  | FKDMRNTIM         |
| 21] | pos= 378 | score=0.031676 | unnormalised=5.0145600000  | IMASKSVGT         |
| 22] | pos= 388 | score=0.042844 | unnormalised=6.7825600000  | LKRQLADLV         |
| 23] | pos= -1  | score=0.417968 | unnormalised=66.1680000000 | non-binding event |

=====  
 Allele: DRB1\_0101  
 Pseudo sequence: KFAHVEQRKAQTRV  
 Threshold: 2.392440  
 Max score: 26.461000

-----  
 Antigen sequence file: /opt/lampp/htdocs/C-IMMSIM/Jobs/input/50712\_20260521-164125\_5\_z3nbfLoryBar.FSA\_1\_001  
 -----

MAKLTDELDDAFKEMTLLELSDFVKKFEETFEVTAAPVAVAAAGAAPAAAAAEEAAEEAAEEDDIDLMVVGVEVPA  
 ARAVVNKVDELDDGKTAAKIGAILTAAMAKTEAAKPVVEAAGAEAAARKLEDRVNSDILEEAAKVAQKLSKPVDPDTGL  
 EPDDLKKEKSALRYGNVLAQSTMKADEITPGRFRMASKSVGTAEKFKHLGDDMDPELRCPGPKPKHLYVSMRAYFINRQ  
 KGVIGFGFFVFIPIVLKAMLFWGKEAVTLQSRRAAVTNRAYFINRGLFPAQIKAAAYRQTVKENKGTRIRFKIPIVLKA  
 LYMLSTRGKEKSALRYGNVLDVNSFMGTNRAYFINRQKRVTVKENKGTRIRFKDMRNTIMASKSVGTALKRQLADLVAAA  
 KLAHHHHHH

Epitopes of protein 0 -----  

|     |          |                |                            |                   |
|-----|----------|----------------|----------------------------|-------------------|
| 0]  | pos= 12  | score=0.005569 | unnormalised=0.8815600000  | FKEMTLLEL         |
| 1]  | pos= 31  | score=0.050380 | unnormalised=7.9755600000  | FEVTAAPV          |
| 2]  | pos= 33  | score=0.049533 | unnormalised=7.8415600000  | VTAAPVAV          |
| 3]  | pos= 39  | score=0.001330 | unnormalised=0.2105600000  | VAVAAAGAA         |
| 4]  | pos= 41  | score=0.031183 | unnormalised=4.9365600000  | VAAAGAAPA         |
| 5]  | pos= 75  | score=0.001153 | unnormalised=0.1825600000  | VEVPAARAV         |
| 6]  | pos= 98  | score=0.019251 | unnormalised=3.0475600000  | IGAILTAAM         |
| 7]  | pos= 136 | score=0.013881 | unnormalised=2.1975600000  | ILEEAAKAV         |
| 8]  | pos= 173 | score=0.046034 | unnormalised=7.2875600000  | YGNVLAQST         |
| 9]  | pos= 176 | score=0.017362 | unnormalised=2.7485600000  | VLAQSTMKA         |
| 10] | pos= 228 | score=0.107041 | unnormalised=16.9455600000 | YVSMRAYFI         |
| 11] | pos= 236 | score=0.021076 | unnormalised=3.3365600000  | INRQKGVIG         |
| 12] | pos= 248 | score=0.027121 | unnormalised=4.2935600000  | FVFIPIVL          |
| 13] | pos= 261 | score=0.000698 | unnormalised=0.1105600000  | FWGKEAVTL         |
| 14] | pos= 269 | score=0.014936 | unnormalised=2.3645600000  | LQSRRAAVT         |
| 15] | pos= 292 | score=0.002574 | unnormalised=0.4075600000  | IKAAAYRQT         |
| 16] | pos= 301 | score=0.002972 | unnormalised=0.4705600000  | VKENKGTRI         |
| 17] | pos= 317 | score=0.023079 | unnormalised=3.6535600000  | LKALYMLST         |
| 18] | pos= 345 | score=0.018297 | unnormalised=2.8965600000  | MGTNRAYFI         |
| 19] | pos= 361 | score=0.002972 | unnormalised=0.4705600000  | VKENKGTRI         |
| 20] | pos= 371 | score=0.051068 | unnormalised=8.0845600000  | FKDMRNTIM         |
| 21] | pos= 378 | score=0.031676 | unnormalised=5.0145600000  | IMASKSVGT         |
| 22] | pos= 388 | score=0.042844 | unnormalised=6.7825600000  | LKRQLADLV         |
| 23] | pos= -1  | score=0.417968 | unnormalised=66.1680000000 | non-binding event |
