# Supplementary material
Source: Research Square preprint supplement (doi:10.21203/rs.3.rs-9885979/v1)
Supplement: Supplementary file 9 [file a1e787a1023c9b6cc6e033e6.docx]

**VaxiJen RESULTS**

**Model selected: virus**

**Threshold for this model: 0.4**

**Your Sequence:**

MAKLSTDELLDAFKEMTLLELSDFVKKFEET
FEVTAAAPVAVAAAGAAPAAAAPAAEEAAEE
AAEEDDIDLMVVGVEVPAARAVVNKVDELDG
KTAAKIGAILTAAMAKTEAAKPVVEAAGAEE
AARKLEDRVNSDILEEAAAKVAAQKLASKPV
DPTGLEPDDHLKEKSALRYGNVLAQSTMKAD
EITPGRFRMASKSVGTAEEKFHLGDDMDPEL
RCPGPGKPKHLYVSMRAYFINRQKGVIGFGF
FVFVIPIVLKAMLFWGKEAVTLQSRRAAVTN
RAYFINRGLFPAQIKAAAYRQTVKENKGTRI
RFKIPIVLKALYMLSTRGKEKSALRYGNVLD
VNSFMGTNRAYFINRQKRQTVKENKGTRIRF
KDMRNTIMASKSVGTALKRQLADLVAAQKLA
HHHHHH


Overall Prediction for the Protective Antigen =**0.5883**( Probable **ANTIGEN** ).
