# Supplementary material
Source: Research Square preprint supplement (doi:10.21203/rs.3.rs-9885979/v1)
Supplement: Supplementary file 9 [file aa27a9a02abf46e6af95e263.xlsx]

## Sheet: Sheet1
Antigen	Allele	Allergenecity	Antigenecity
YQSYLRRTQSMGIQL	HLA-DRB1*07:01	Allergen	Antigen
HLYVSMPTAQSTMKA	HLA-DRB1*01:01	Non-allergen	Non-Antigen
RQTVKENKGTRIRFK	HLA-DRB1*13:02	Non-allergen	Antigen
MGIQLDQKIIILYML	HLA-DRB1*03:01	Allergen	Antigen
KALYMLSTRGRQTVK	HLA-DRB5*01:01	Allergen	Antigen
HLYVSMPTAQSTMKA	HLA-DRB1*04:01	Non-allergen	Non-Antigen
GFFVKDWAERIEDFL	HLA-DRB3*01:01	Allergen	Non-Antigen
AIGAYILGFVIPIVL	HLA-DQA1*01:01,DQB1*05:01	Non-allergen	Non-Antigen
PTALYVAGIPELGAF	HLA-DRB1*09:01	Non-allergen	Non-Antigen
