# Supplementary material
Source: Research Square preprint supplement (doi:10.21203/rs.3.rs-9885979/v1)
Supplement: Supplementary file 11 [file c7ccc851d1d935b5907cae33.docx]

**Nucleocapsid protein [Alto Paraguay hantavirus]**

GenBank: ABC70872.1

>ABC70872.1 nucleocapsid protein [Alto Paraguay hantavirus]

MSNLQEVQEGITLHEQQLVAARQKLKDAEKAVEVDPDDVNKSTLQSRRAAVSTLENKIAELKRQLADLVA

AQKLASKPVDPTGLEPDDHLKEKSALRYGNVLDVNSIDLEEPSGQTADWKAIGAYILGFVIPIVLKALYM

LSTRGRQTVKENKGTRIRFKDDSSYEEINGIRKPKHLYVSMPTAQSTMKADEITPGRFRTIACGLFPAQI

KARNIISPVMGVIGFGFFVKDWAERIEDFLASDCPFLPKPKTQAESFMGTNRAYFINRQKQVDESRVPDI

VDLINAAESESATLFNDIAVPHSVWVFSCAPDRCPPTALYVAGIPELGAFFSILQDMRNTIMASKSVGTA

EEKLKKKSAFYQSYLRRTQSMGIQLDQKIIILYMLFWGKEAVNHFHLGDDMDPELRQLAQSLIDAKVKEI

SNQEPLKL
