# Supplementary material
Source: Research Square preprint supplement (doi:10.21203/rs.3.rs-9885979/v1)
Supplement: Supplementary file 11 [file d22ed068c79e2bdfaaee96c3.xlsx]

## Sheet: Sheet1
Antigen	Allergenecity	Antigenecity
VDPDDVNKST	Allergen	Antigen
VAAQKLASKPVDPTGLEPDDHLKEKSALRYGNVL	Non-allergen	Antigen
SIDLEEPSGQ	Allergen	Non-antigen
QTVKENKGTRIRFKDDSSYEEINGIRKPKH	Non-allergen	Non-antigen
AQSTMKADEITPGRFR	Non-allergen	Antigen
PFLPKPKTQAESFMGTNRAYFINRQKQVDESRVPD	Allergen	Antigen
MASKSVGTAEEK	Non-allergen	Antigen
FHLGDDMDPELR	Non-allergen	Antigen
