# Supplementary material
Source: Research Square preprint supplement (doi:10.21203/rs.3.rs-9885979/v1)
Supplement: Supplementary file 12 [file edbfe5bc62bb0acbd48e0570.docx]

AllerTop Results

**Results for your protein:**
MAKLSTDELLDAFKEMTLLELSDFVKKFEETFEVTAAAPVAVAAAGAAPAAAAPAAEEAAEEAAEEDDIDLMVVGVEVPAARAVVNKVDELDGKTAAKIGAILTAAMAKTEAAKPVVEAAGAEEAARKLEDRVNSDILEEAAAKVAAQKLASKPVDPTGLEPDDHLKEKSALRYGNVLAQSTMKADEITPGRFRMASKSVGTAEEKFHLGDDMDPELRCPGPGKPKHLYVSMRAYFINRQKGVIGFGFFVFVIPIVLKAMLFWGKEAVTLQSRRAAVTNRAYFINRGLFPAQIKAAAYRQTVKENKGTRIRFKIPIVLKALYMLSTRGKEKSALRYGNVLDVNSFMGTNRAYFINRQKRQTVKENKGTRIRFKDMRNTIMASKSVGTALKRQLADLVAAQKLAHHHHHH

- Most similar protein: sp|Q0IMG9|SL11_ORYSJ E3 ubiquitin-protein ligase SPL11 OS=Oryza sativa subsp. japonica GN=SPL11 PE=1 SV=2
- Classification based on the most similar protein: Probable NON-ALLERGEN
