# Supplementary material
Source: Research Square preprint supplement (doi:10.21203/rs.3.rs-9885979/v1)
Supplement: Supplementary file 13 [file fc5676c72cf4ba7eb32d6e69.docx]

AllerTOP RESULTS

**Results for your protein:**
MSNLQEVQEGITLHEQQLVAARQKLKDAEKAVEVDPDDVNKSTLQSRRAAVSTLENKIAELKRQLADLVAAQKLASKPVDPTGLEPDDHLKEKSALRYGNVLDVNSIDLEEPSGQTADWKAIGAYILGFVIPIVLKALYMLSTRGRQTVKENKGTRIRFKDDSSYEEINGIRKPKHLYVSMPTAQSTMKADEITPGRFRTIACGLFPAQIKARNIISPVMGVIGFGFFVKDWAERIEDFLASDCPFLPKPKTQAESFMGTNRAYFINRQKQVDESRVPDIVDLINAAESESATLFNDIAVPHSVWVFSCAPDRCPPTALYVAGIPELGAFFSILQDMRNTIMASKSVGTAEEKLKKKSAFYQSYLRRTQSMGIQLDQKIIILYMLFWGKEAVNHFHLGDDMDPELRQLAQSLIDAKVKEISNQEPLKL

- Most similar protein: sp|Q9H799|CE042_HUMAN Uncharacterized protein C5orf42 OS=Homo sapiens GN=C5orf42 PE=1 SV=4
- Classification based on the most similar protein: Probable NON-ALLERGEN
