# Supplementary material
Source: Research Square preprint supplement (doi:10.21203/rs.3.rs-9885979/v1)
Supplement: Supplementary file 14 [file fd0aaed8fa0dee12f257166e.docx]

**Number of amino acids:** 428

**Theoretical pI:** 6.64

**Molecular weight:** 47922.05

**Total number of negatively charged residues (Asp + Glu):** 56

**Total number of positively charged residues (Arg + Lys):** 55

**Formula:** C2137H3417N581O637S15

**Total number of atoms:** 6787

Ext. coefficient 36900

Abs 0.1% (=1 g/l) 0.770, assuming all Cys residues are reduced

**Estimated half-life:**

The N-terminal of the sequence considered is M (Met).

The estimated half-life is: 30 hours (mammalian reticulocytes, in vitro).

>20 hours (yeast, in vivo).

>10 hours (Escherichia coli, in vivo).

**Instability index:**

The instability index (II) is computed to be 43.66

This classifies the protein as unstable.

**Aliphatic index:** 90.28

**Grand average of hydropathicity (GRAVY):**-0.291
