# Supplementary material
Source: Research Square preprint supplement (doi:10.21203/rs.3.rs-9885979/v1)

# Ramachandran plot

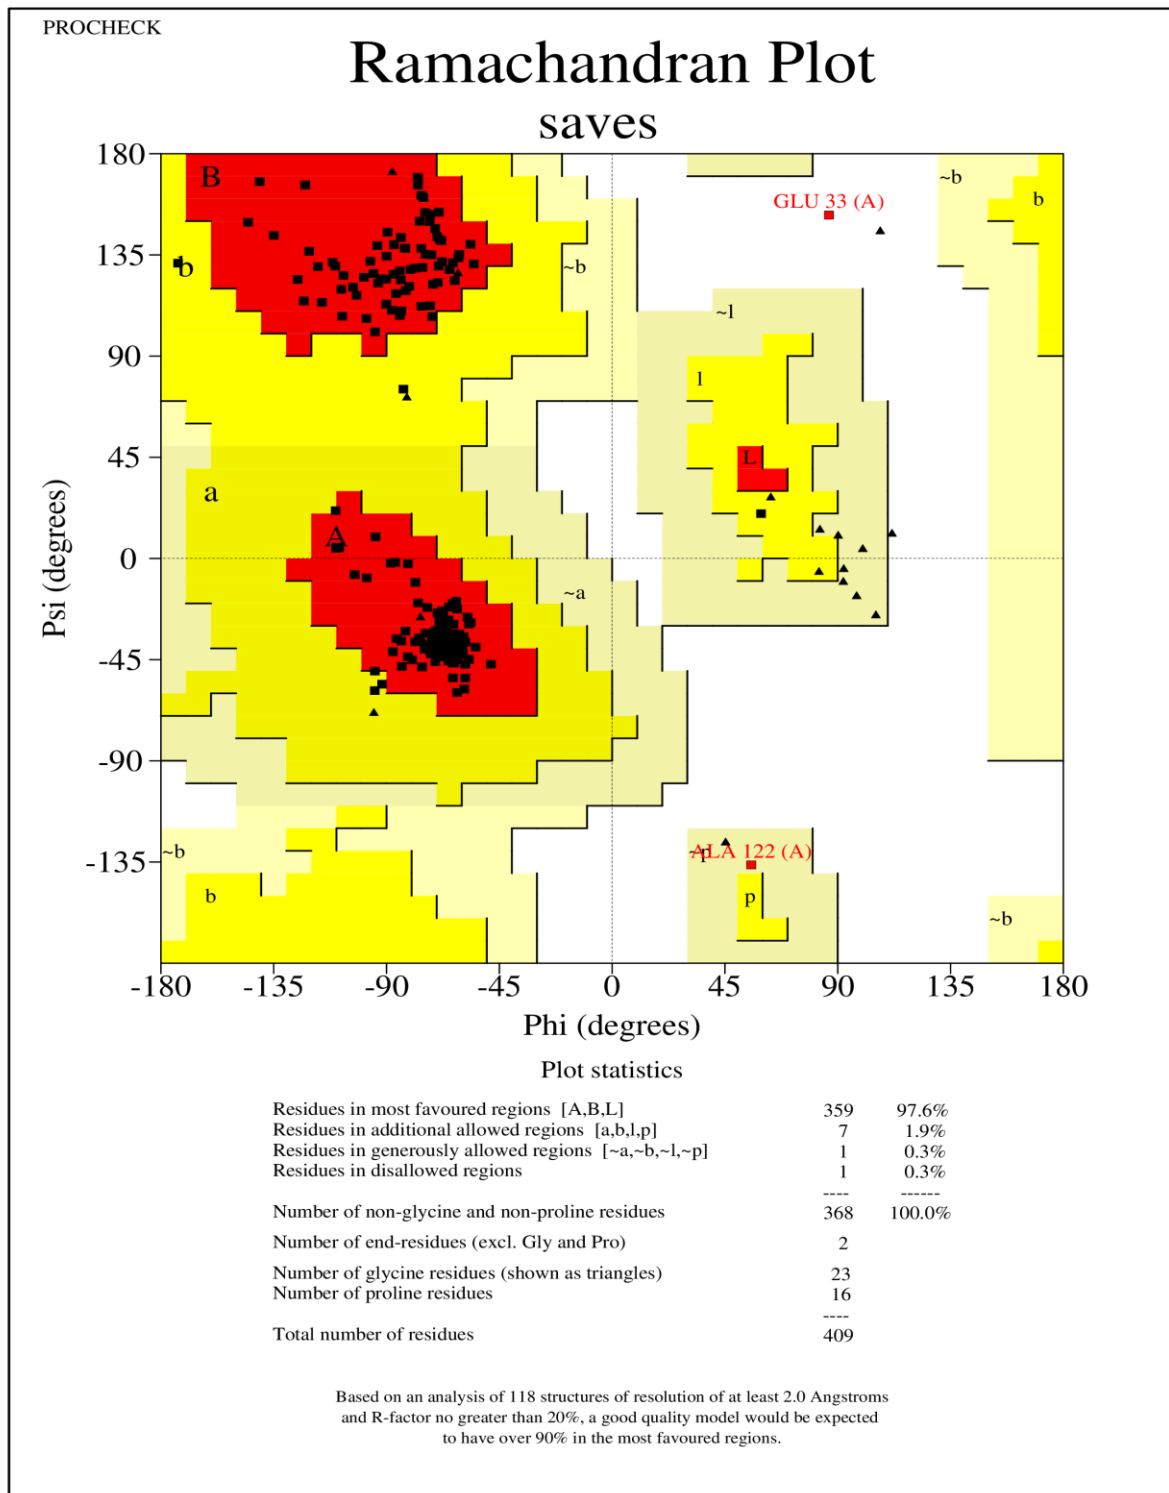

Supplement: Supplementary file 10 [file ade32ec48ca85cc3e2557960.pdf]
